# Supplementary material for: Nutritional modification of &lt;i&gt;SCD&lt;/i&gt;, &lt;i&gt;ACACA&lt;/i&gt; and &lt;i&gt;LPL&lt;/i&gt; gene expressions in different ovine tissues
Source: Copernicus journal article supplement (doi:10.5194/aab-60-243-2017), 2017-07-26
Supplement: Supplementary file 1 [file aab-60-243-2017-supplement.pdf]

Supplement of Arch. Anim. Breed., 60, 243–250, 2017  
<https://doi.org/10.5194/aab-60-243-2017-supplement>  
© Author(s) 2017. This work is distributed under  
the Creative Commons Attribution 3.0 License.

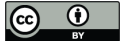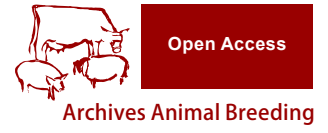

*Supplement of*

## **Nutritional modification of *SCD*, *ACACA* and *LPL* gene expressions in different ovine tissues**

**Katarzyna Ropka-Molik et al.**

*Correspondence to:* Katarzyna Ropka-Molik ([katarzyna.ropka@izoo.krakow.pl](mailto:katarzyna.ropka@izoo.krakow.pl))

The copyright of individual parts of the supplement might differ from the CC BY 3.0 License.

Table S1. The composition and nutritional value of complete mixture for lambs control group (diet I).

| <b>Compltere mixture – control group (diet I)</b>                            |       |
|------------------------------------------------------------------------------|-------|
| <b>Individual components %</b>                                               |       |
| Barley                                                                       | 15.0  |
| Wheat bran                                                                   | 15.0  |
| Oat                                                                          | 15.0  |
| Wheat                                                                        | 13.0  |
| Soybean post-extraction meal                                                 | 21.0  |
| Dried grass                                                                  | 16.0  |
| Mel stern                                                                    | 2.5   |
| NaCl                                                                         | 1.0   |
| Mineral-vitamin supplement                                                   | 1.5   |
| <b>The composition of integrities in the ration, kg:</b>                     |       |
|                                                                              | 10.3  |
| Metabolisable energy, MJ                                                     | 190.0 |
| Total protein, g                                                             | 159.0 |
| Useful protein nBO, g                                                        | 28.2  |
| Protein UDP,%                                                                | 26.2  |
| Crude fat, g                                                                 | 251.0 |
| Starch, g                                                                    | 501.0 |
| Nitrogen free extraction NFE, g                                              | 80.8  |
| Ash content, g                                                               | 87.5  |
| Crude fiber, g                                                               | 140.0 |
| Acid detergent fiber ADF, g                                                  | 247.0 |
| Neutral detergent fiber NDF, g                                               | 11.7  |
| Calcium, g                                                                   | 5.1   |
| Phosphorus, g                                                                | 2.1   |
| Sodium, g                                                                    | 3.9   |
| Magnesium, g                                                                 |       |
| <b>Fatty acid concentration (presented as % of total fatty acid content)</b> |       |
| Linoleic acid (C18:2)                                                        | 9.8   |
| Poliunsaturated fatty acid n3 + n6                                           | 11.3  |

Table S2. The composition and nutritional value of the mixture for experimental groups (diets II and III).

| <b>Compltere mixture –experimental groups<br/>(diets II and III)</b>         |       |
|------------------------------------------------------------------------------|-------|
| <b>Individual components %</b>                                               |       |
| Barley                                                                       | 17.0  |
| Wheat bran                                                                   | 8.9   |
| Oat                                                                          | 13.0  |
| Wheat                                                                        | 14.0  |
| Soybean post-extraction meal                                                 | 20.0  |
| Dried grass                                                                  | 1.2   |
| Mel stern                                                                    | 2.5   |
| NaCl                                                                         | 0.1   |
| Mineral-vitamin suplement                                                    | 1.9   |
| Corn                                                                         | 8.9   |
| Flour from wheat grain                                                       | 8.9   |
| Post-extracted rapeseed meal                                                 | 1.5   |
| Dried molasses beet pulp                                                     | 0.5   |
| Beer yeast                                                                   | 1.5   |
| <b>The composition of integrities in the ration, kg:</b>                     |       |
|                                                                              | 10.6  |
| Metabolisable energy, MJ                                                     | 185.0 |
| Total protein, g                                                             | 159.0 |
| Useful protein nBO, g                                                        | 27.4  |
| Protein UDP,%                                                                | 26.2  |
| Crude fat, g                                                                 | 334.0 |
| Starch, g                                                                    | 531.0 |
| Nitrogen free extraction NFE, g                                              | 77.3  |
| Ash content, g                                                               | 55.2  |
| Crude fiber, g                                                               | 115.0 |
| Acid detergent fiber ADF, g                                                  | 195.0 |
| Neutral detergent fiber NDF, g                                               | 13.7  |
| Calcium, g                                                                   | 6.0   |
| Phosphorus, g                                                                | 2.5   |
| Sodium, g                                                                    | 2.5   |
| Magnesium, g                                                                 |       |
| <b>Fatty acid concentration (presented as % of total fatty acid content)</b> |       |
| Linoleic acid (C18:2)                                                        | 11.4  |
| Poliunsaturated fatty acid n3 + n6                                           | 12.4  |

Table S3. Sequences of primers, probes, and PCR efficiencies of the investigated genes and endogenous controls.

| Gene symbol   | Gene name                       | GenBank Accession No. | Primer sequence                                                                                             | Probe sequence (MGB)    | Label | Amplicon length (bp) | PCR efficiency |
|---------------|---------------------------------|-----------------------|-------------------------------------------------------------------------------------------------------------|-------------------------|-------|----------------------|----------------|
| <i>SCD1</i>   | Stearoyl-Coenzyme Adesaturaze 1 | <b>FJ513370.1</b>     | FTTCCAGATCTCTAGCTCCTACACAAC<br>R CAATTTGCCCCCTCCATTCT                                                       | CACCATCACAGCACCT        | FAM   | 86                   | 1.92           |
| <i>ACACA</i>  | acetyl-CoA carboxylase alpha    | <b>NM_001009256.1</b> | F AGCCTGCCCTAGCTTTCCA<br>R CCCGAGATACAAGTGCATCTTG                                                           | AGAAATTTTGACCTTACTGCCAT | FAM   | 76                   | 2.02           |
| <i>LPL</i>    | Lipoprotein Lipase              | <b>NM_001009394</b>   | F CCTAACGGAGGCACTTTCCA<br>R TGCAATCACACGGAGAGCTT                                                            | CCAGGATGTAACATTG        | FAM   | 59                   | 2.01           |
| <i>ATP5G2</i> | H(+)-transporting ATP synthase  | <b>NM_001009468</b>   | Custom real-time PCR assays with VIC equivalent labeled double dye probe (Taqman style) – PrimerDesign Ltd. |                         | VIC   | 141                  | 2.00           |
| <i>RPS2</i>   | Ribosomal protein S2 mRNA       | <b>DQ520732</b>       | Custom real-time PCR assays with VIC equivalent labeled double dye probe (Taqman style) – PrimerDesign Ltd. |                         | VIC   | 87                   | 1.97           |
